# Supplementary material for: Isolation and Characterization of Two Cellulose Morphology Mutants of Gluconacetobacter hansenii ATCC23769 Producing Cellulose with Lower Crystallinity
Source: PubMed Central journal article supplement (PMC4366249; doi:10.1371/journal.pone.0119504), 2015-03-19
Supplement: pone.0119504.s006.pdf [file pone.0119504.s006.pdf]

**Table S2 Primers used in this study.**

| Primer              | Sequence (5'-3') <sup>a</sup>                                        | Note                                                 |
|---------------------|----------------------------------------------------------------------|------------------------------------------------------|
| TetR F1             | agtc <u>aagctt</u> AGCTTTAATGCGGTAGT ( <i>Hind</i> III)              | amplification of <i>tetC</i> for cloning into pMOD-3 |
| TetR R1             | agtc <u>gaattc</u> GGTTGGTTTGCGCATTCACA ( <i>Eco</i> RI)             |                                                      |
| ME plus 9-3' primer | CTGTCTCTTATAACACATCTCAACCATCA                                        | For amplification of Tn5 transposon DNA              |
| ME plus 9-5' primer | CTGTCTCTTATAACACATCTCAACCCTGA                                        |                                                      |
| TSP1                | GAACGGGTTGGCATGGATTGT                                                | for genomic DNA walking PCR                          |
| TSP2                | GGCCACCTCGACCTGAATGGAA                                               |                                                      |
| I23-CEF             | aggagggtacag <u>atct</u> ATGTCCATTTCTCGGTCGCTGT ( <i>Bg</i> II)      | for complementation of <i>LDC</i> in mutant I-23     |
| I23-CER             | gcggaagctat <u>ttaaatc</u> GAAATGACCGACATTGGCGTTG ( <i>Swa</i> I)    |                                                      |
| #52-CEF             | aggagggtacag <u>atct</u> ATGTCCATTTCCATTGATATGCTCGAT ( <i>Bg</i> II) | for complementation of <i>AlaR</i> in mutant #52     |
| #52-CER             | gcggaagctat <u>ttaaatc</u> GCTTACACCACCACGTGCGATGA ( <i>Swa</i> I)   |                                                      |

<sup>a</sup> Lower-case letters of a primer sequence indicate the sequence designed for overlap between the resulting PCR fragment and another PCR fragment, or a cloning vector, for in-fusion cloning; upper-case letters of a primer sequence indicate the sequence corresponding to the gene to be amplified; the underlined in a primer sequence indicates the recognition sequence of the restriction enzyme shown in parentheses.
